# Supplementary material for: APEX: an Annotation Propagation Workflow through Multiple Experimental Networks to Improve the Annotation of New Metabolite Classes in Caenorhabditis elegans
Source: PubMed Central journal article supplement (PMC10701709; doi:10.1021/acs.analchem.3c02797), 2023-11-20
Supplement: ac3c02797_si_001.pdf [file ac3c02797_si_001.pdf]

# Supporting Information

## APEX – an annotation propagation workflow through multiple experimental networks to improve the annotation of new metabolite classes in *Caenorhabditis elegans*

Liesa Salzer<sup>1</sup>, Elva María Novoa-del-Toro<sup>2</sup>, Clément Frainay<sup>2</sup>, Kohar Annie B. Kissoyan<sup>3</sup>,  
Fabien Jourdan<sup>2,4</sup>, Katja Dierking<sup>3</sup>, Michael Witting<sup>5,6\*</sup>

<sup>1</sup> Research Unit Analytical BioGeoChemistry, Helmholtz Zentrum München, 85764 Neuherberg, Germany

<sup>2</sup> Toxalim (Research Centre in Food Toxicology), Université de Toulouse, INRAE, ENVT, INP-Purpan, UPS, 180 chemin de Tournefeuille St-Martin-du-Touch, BP 3, 31931 Toulouse Cedex, France

<sup>3</sup> Department of Evolutionary Ecology and Genetics, Zoological Institute, Kiel University, 24118 Kiel, Germany

<sup>4</sup> MetaToul-MetaboHUB, National Infrastructure of Metabolomics and Fluxomics, 180 chemin de Tournefeuille St-Martin-du-Touch, BP 3, 31931 Toulouse Cedex, France

<sup>5</sup> Metabolomics and Proteomics Core, Helmholtz Zentrum München, 85764 Neuherberg, Germany

<sup>6</sup> Chair of Analytical Food Chemistry, TUM School of Life Sciences, Technical University of Munich, 85354 Freising-Weihenstephan, Germany

\* corresponding author:

Dr. Michael Witting, michael.witting@helmholtz-munich.de

## *S1 Overview of the APEX workflow*

The automated **A**nnotation **P**ropagation through multiple **EX**perimental networks (APEX) workflow was defined as follows:

```
for each manually annotated seed node S_i (GPNAE / ascarosides):
  get the set of neighbors N(S_i)

  for each neighbor node N_j in N(S_i):
    for each mass difference edge connecting S_i to N_j:
      if m(N_j) < m(S_i) and the corresponding chemical formula (formula(S_i)
      - formula(N_j)) is not in the chemical formula of S_i:
        remove the edge

      if N_j is not annotated yet:
        annotate N_j with the chemical formula corresponding to
        (formula(N_j) +/- formula(S_i)), if available

        add new attributes to N_j containing the networks connecting N_j
        and S_i, the seed node S_i, and other available attributes (i.e.
        values of spectral similarity, mass-difference, and homologous
        series)
      else:
        if the number of networks connecting N_j and S_i is greater than
        the current annotation or if the number is the same but the mass
        difference |m(N_j) - m(S_i)| is smaller than the existing
        annotation:
          replace the existing annotation with the new one by:

          annotate N_j with the chemical formula corresponding to
          (formula(N_j) +/- formula(S_i)), if available

          add new attributes to N_j containing the networks
          connecting N_j and S_i, the seed node S_i, and other
          available attributes (i.e. values of spectral similarity,
          mass-difference, and homologous series)
```
